# Supplementary material for: Starvation-induced autophagy via calcium-dependent TFEB dephosphorylation is suppressed by Shigyakusan
Source: PubMed Central journal article supplement (PMC7058311; doi:10.1371/journal.pone.0230156), 2020-03-05

# Supplementary Fig 1

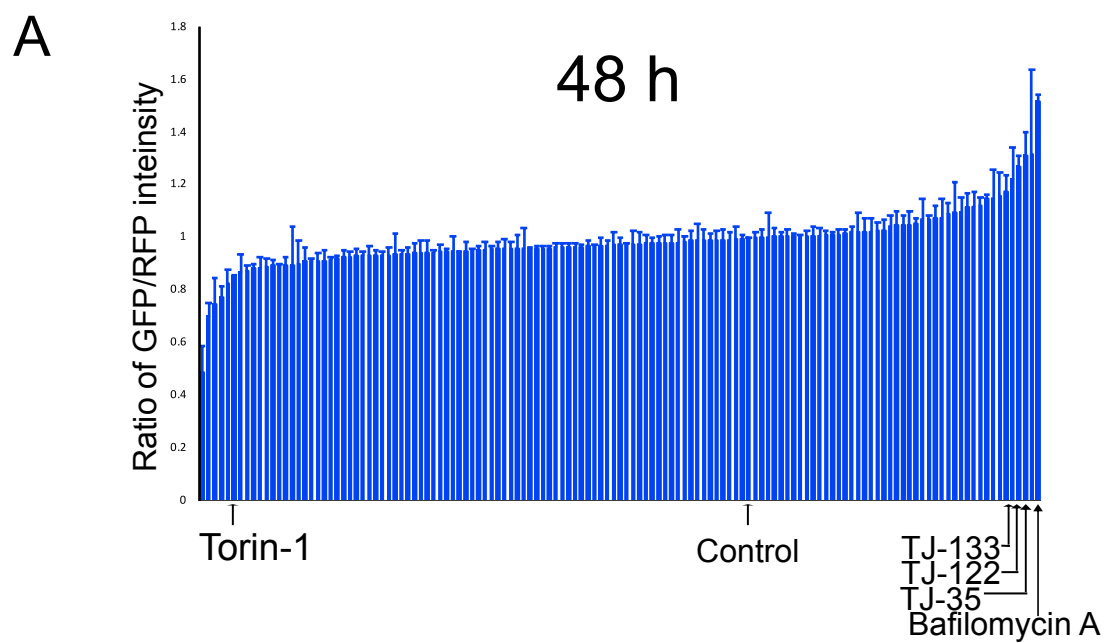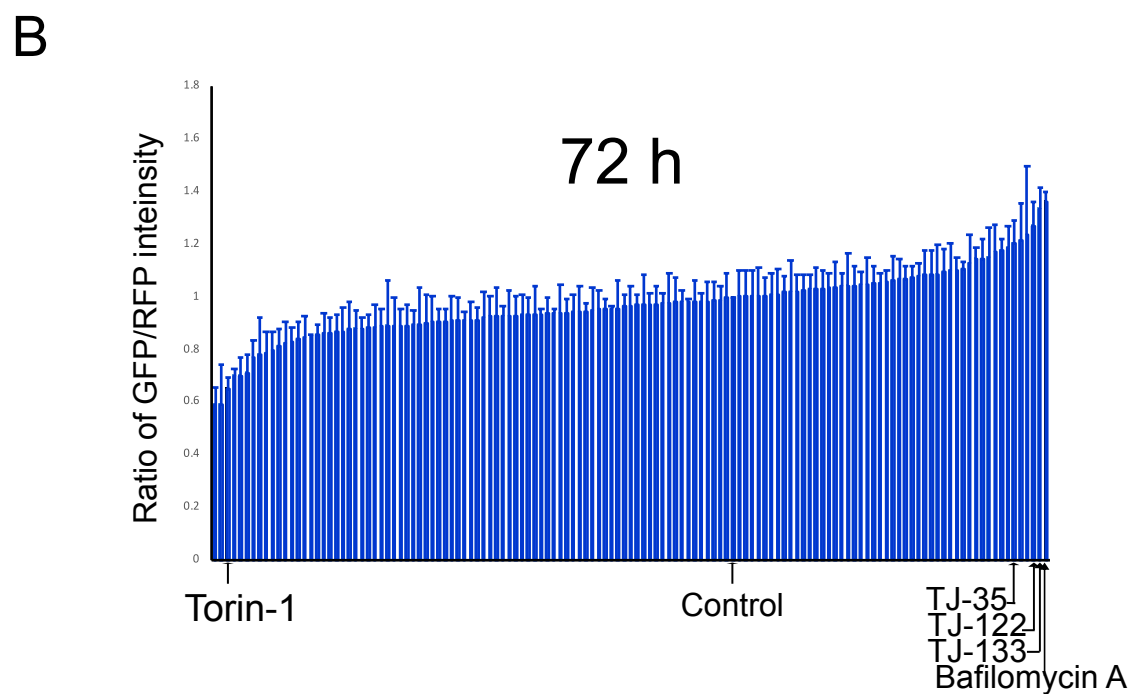

Supplement: pone.0230156.s001.pdf [file pone.0230156.s001.pdf]
