# Supplementary material for: Starvation-induced autophagy via calcium-dependent TFEB dephosphorylation is suppressed by Shigyakusan
Source: PubMed Central journal article supplement (PMC7058311; doi:10.1371/journal.pone.0230156), 2020-03-05

# Full blot images-Figure 2C

|               |   |   |   |   |
|---------------|---|---|---|---|
| EBSS          | + | + | + | + |
| TJ-35         | - | - | + | + |
| Bafilomycin A | - | + | - | + |

LC3-II

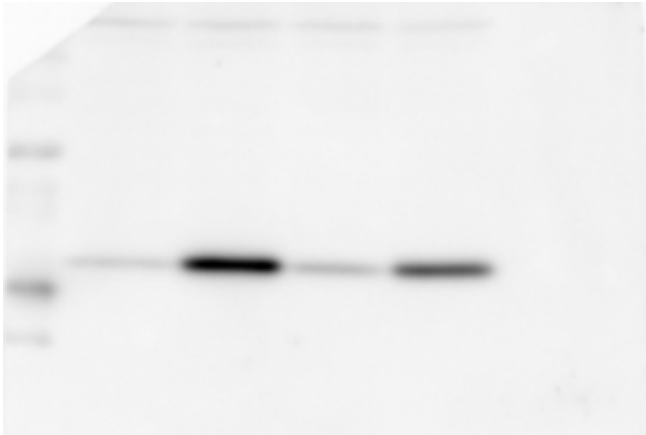

Tubulin

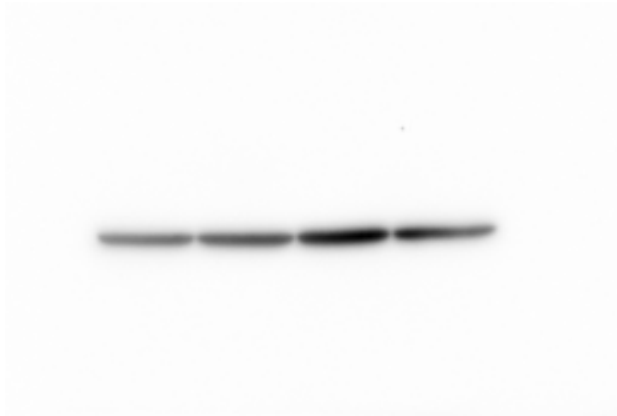

Supplement: pone.0230156.s008.pdf [file pone.0230156.s008.pdf]
