# Supplementary material for: Starvation-induced autophagy via calcium-dependent TFEB dephosphorylation is suppressed by Shigyakusan
Source: PubMed Central journal article supplement (PMC7058311; doi:10.1371/journal.pone.0230156), 2020-03-05

# Full blot images-Figure 4C

C

|         |   |   |   |   |   |   |
|---------|---|---|---|---|---|---|
| EBSS    | - | + | + | - | + | + |
| DMEM    | + | - | - | + | - | - |
| TJ-35   | - | - | - | + | + | + |
| Torin-1 | - | - | + | - | - | + |

p-ULK1

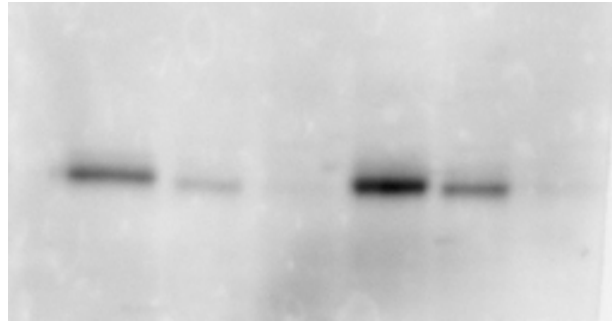

ULK1

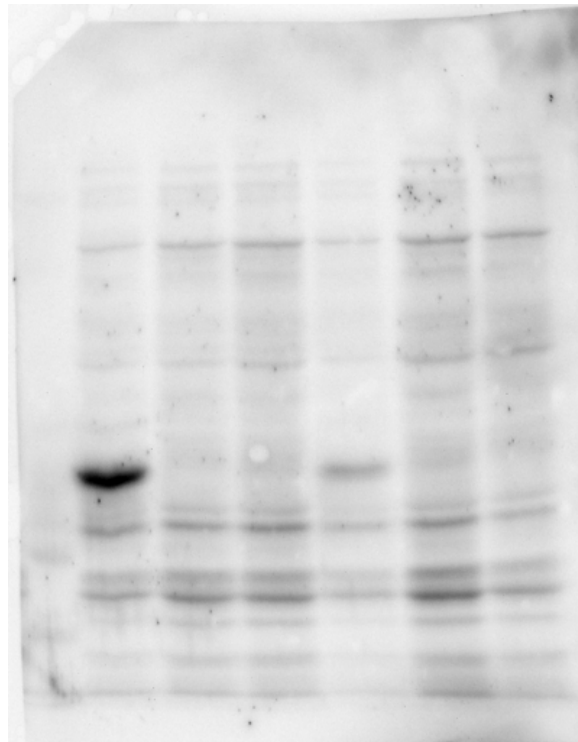

Tubuli

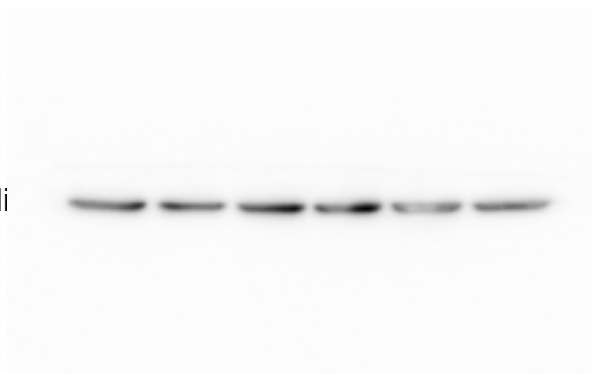

Supplement: pone.0230156.s009.pdf [file pone.0230156.s009.pdf]
