# Supplementary material for: Starvation-induced autophagy via calcium-dependent TFEB dephosphorylation is suppressed by Shigyakusan
Source: PubMed Central journal article supplement (PMC7058311; doi:10.1371/journal.pone.0230156), 2020-03-05

# Full blot images-Figure 4D

D

|       |   |   |   |   |
|-------|---|---|---|---|
| EBSS  | - | - | + | + |
| DMEM  | + | + | - | - |
| TJ-35 | - | + | - | + |

TFEB

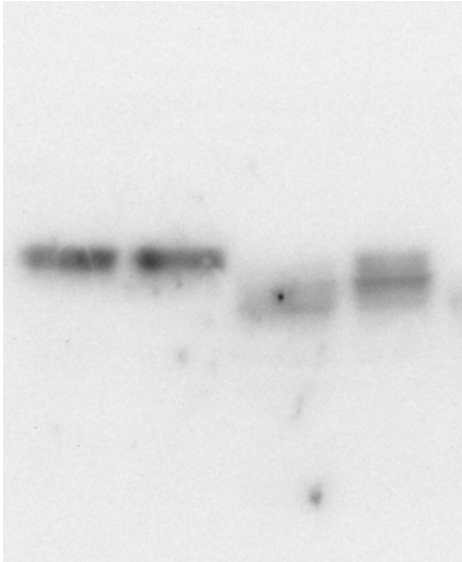

Tubulin

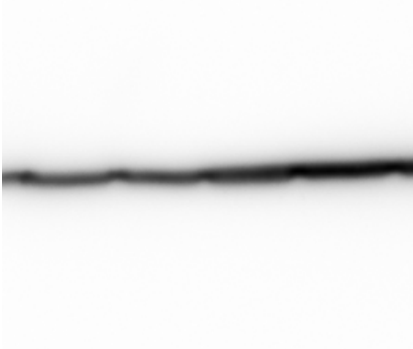

Supplement: pone.0230156.s010.pdf [file pone.0230156.s010.pdf]
