# Supplementary material for: Starvation-induced autophagy via calcium-dependent TFEB dephosphorylation is suppressed by Shigyakusan
Source: PubMed Central journal article supplement (PMC7058311; doi:10.1371/journal.pone.0230156), 2020-03-05

# Full blot images-Figure 6-2

|                                 |   |   |   |    |    |
|---------------------------------|---|---|---|----|----|
| Ionomycin                       | - | + | + | +  | +  |
| Cyclosporin A ( $\mu\text{M}$ ) | - | - | 1 | 10 | 20 |

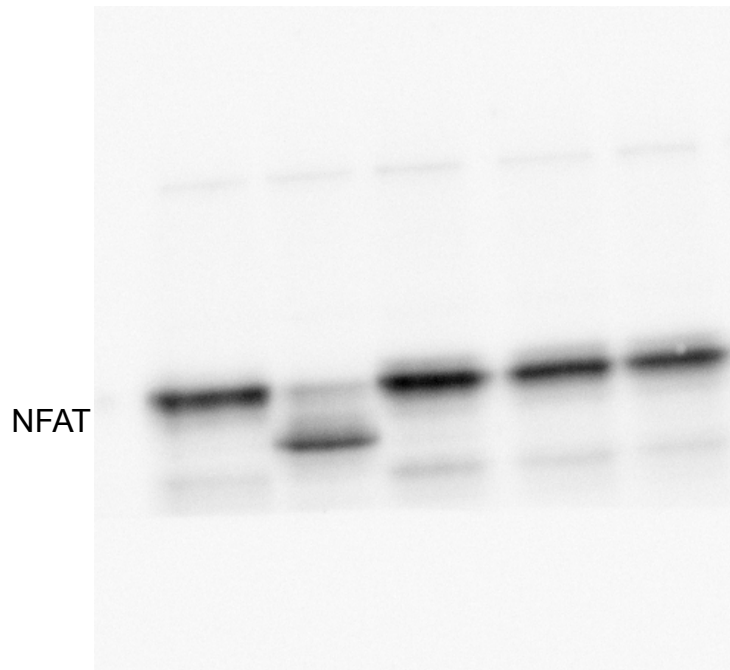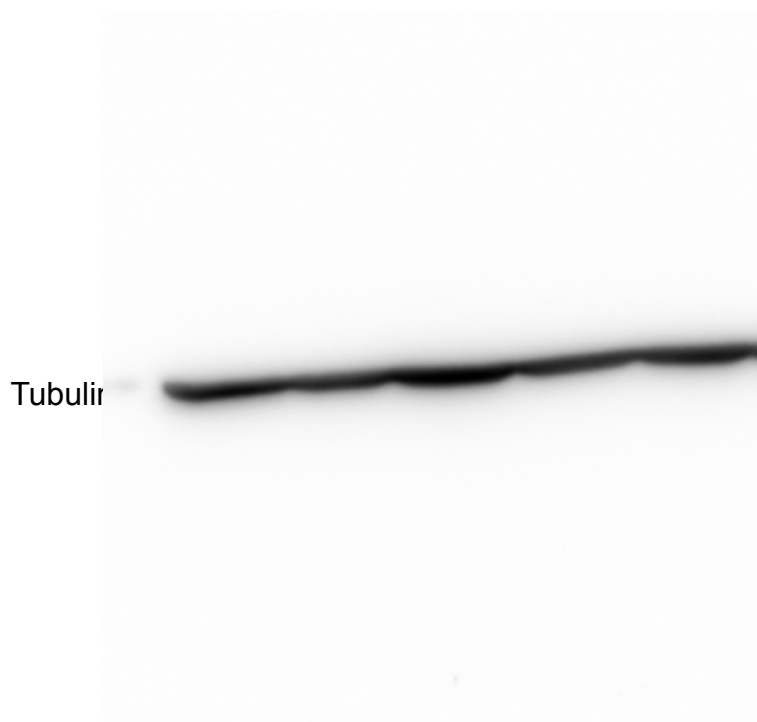

Supplement: pone.0230156.s013.pdf [file pone.0230156.s013.pdf]
